# Supplementary material for: PtRu mesoporous nanospheres as electrocatalysts with enhanced performance for oxidation of methanol
Source: Royal Society of Chemistry journal article supplement (doi:10.1039/d4na00210e), 2024-01-01
Supplement: d4na00210e1.pdf [file d4na00210e1.pdf]

## Supplementary Information

### **PtRu Mesoporous Nanospheres as Electrocatalysts with Enhanced Performance for Oxidation of Methanol**

Jiangbin Guo<sup>a</sup>, Qiyu Yan<sup>a</sup>, Man Zhang<sup>b</sup>, Jun Fang<sup>a</sup>, Shuiyuan Luo<sup>a</sup>, and Jing Xu<sup>a\*</sup>

<sup>a</sup> *College of Chemical Engineering and Materials, Quanzhou Normal University, Quanzhou, Fujian 362000, P. R. China*

<sup>b</sup> *State Key Laboratory of Molecular Engineering of Polymers, Department of Macromolecular Science, Fudan University, Shanghai 200433, P. R. China*

\* Corresponding author.

E-mail address: [jingxu@qztc.edu.cn](mailto:jingxu@qztc.edu.cn) (J. Xu).

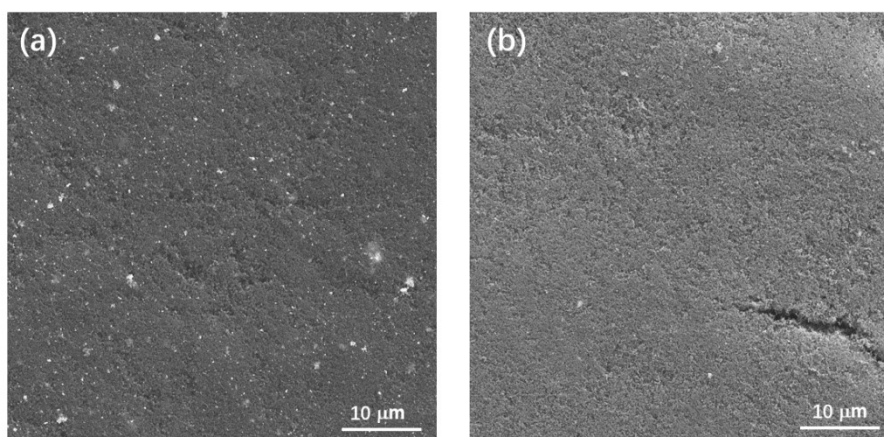

**Fig. S1.** SEM images of the products prepared by the addition of (a) KBr and (b) KCl.

**Table S1.** The formulations of different PtRu MNs.

| Sample         | $K_2PtCl_4$ (mmol) | $RuCl_3$ (mmol) | L-ascorbic acid (mmol) |
|----------------|--------------------|-----------------|------------------------|
| PtRu (3:1) MNs | 0.0225             | 0.0075          | 0.2                    |
| PtRu (2:1) MNs | 0.0225             | 0.01125         | 0.2                    |
| PtRu (1:1) MNs | 0.0225             | 0.0225          | 0.2                    |
| PtRu (1:2) MNs | 0.0225             | 0.045           | 0.2                    |
| PtRu (1:3) MNs | 0.0225             | 0.0675          | 0.2                    |

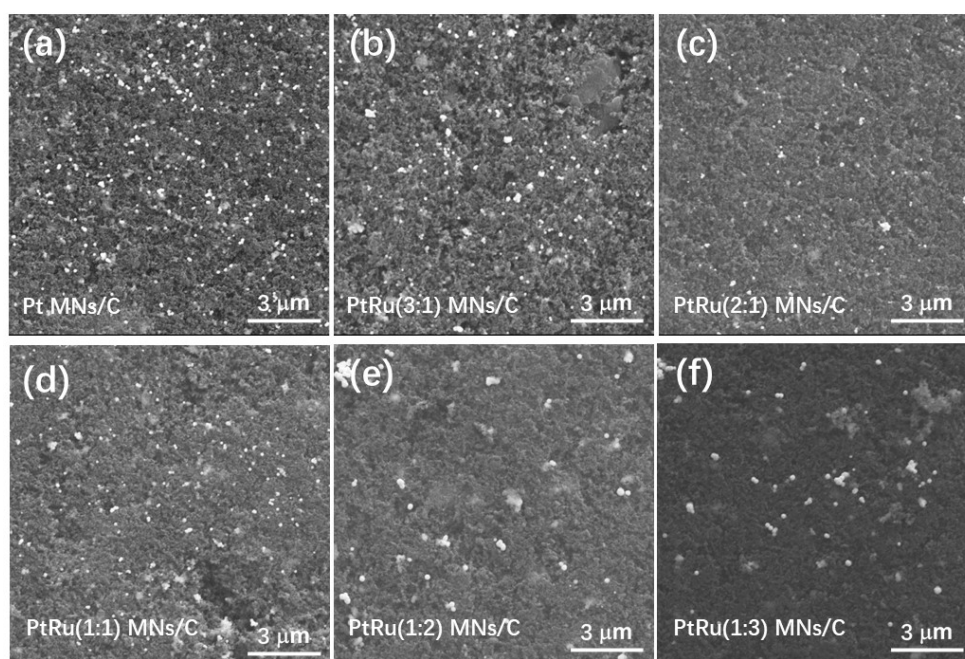

**Fig. S2.** SEM images of (a) Pt MNs/C and (b-f) PtRu MNs/C with different atomic ratios.

**Table S2.** The electrochemical characteristics of the as-prepared Pt MNs/C and PtRu MNs/C catalysts for MOR.

| Sample           | forward peak potential<br>(V) | $I_f$<br>(mA mg <sup>-1</sup> Pt) | $I_b$<br>(mA mg <sup>-1</sup> Pt) | $I_f/I_b$ ratio |
|------------------|-------------------------------|-----------------------------------|-----------------------------------|-----------------|
| Pt MNs/C         | 0.89                          | 17.33                             | 10.20                             | 1.70            |
| PtRu (3:1) MNs/C | 0.87                          | 25.93                             | 16.49                             | 1.57            |
| PtRu (2:1) MNs/C | 0.89                          | 111.77                            | 63.69                             | 1.75            |
| PtRu (1:1) MNs/C | 0.86                          | 39.05                             | 37.73                             | 1.03            |
| PtRu (1:2) MNs/C | 0.89                          | 8.72                              | 5.28                              | 1.65            |
| PtRu (1:3) MNs/C | 0.89                          | 7.36                              | 4.00                              | 1.84            |

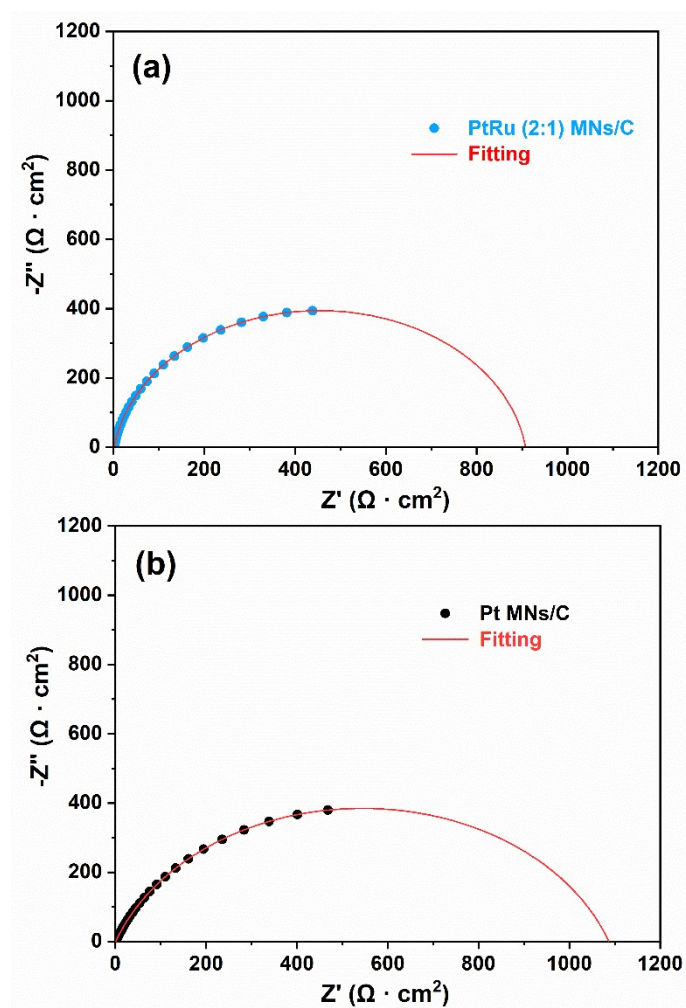

**Fig. S3.** Nyquist plots of EIS for (a) PtRu (2:1) MNs/C and (b) Pt MNs/C in a solution of 0.5 M CH<sub>3</sub>OH and 0.5 M H<sub>2</sub>SO<sub>4</sub>.

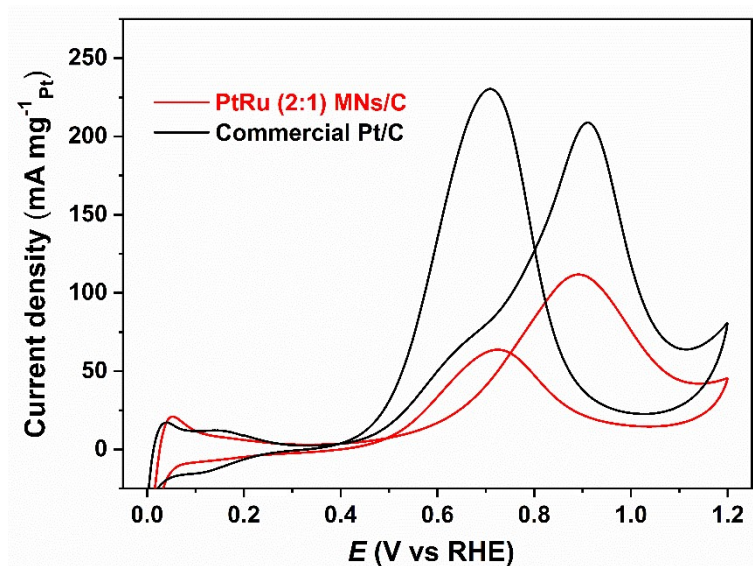

**Fig. S4.** Cyclic voltammety profiles of PtRu (2:1) MNs/C and commercial Pt/C in a solution of 0.5 M  $\text{H}_2\text{SO}_4$  and 0.5 M  $\text{CH}_3\text{OH}$ . The scan rate is  $50 \text{ mV s}^{-1}$ .

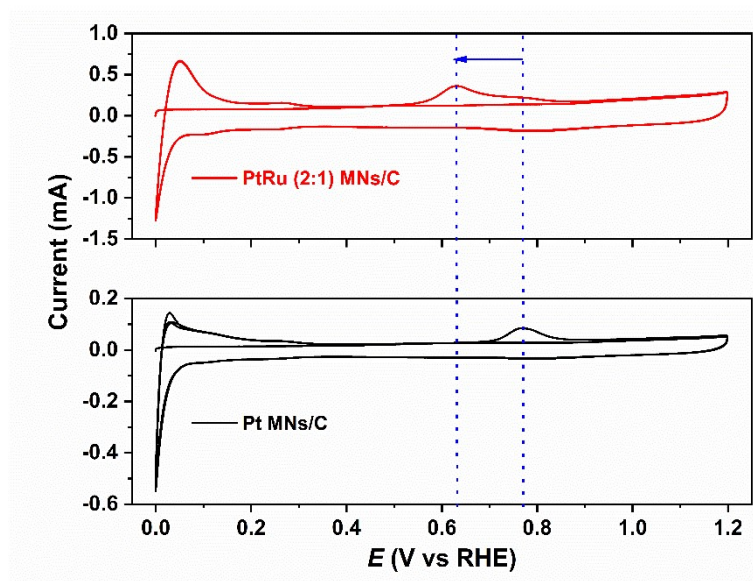

**Fig. S5.** CO stripping voltammograms for PtRu (2:1) MNs/C and Pt MNs/C in CO-saturated 0.5 M  $\text{H}_2\text{SO}_4$  at a sweep rate of  $20 \text{ mV s}^{-1}$ .

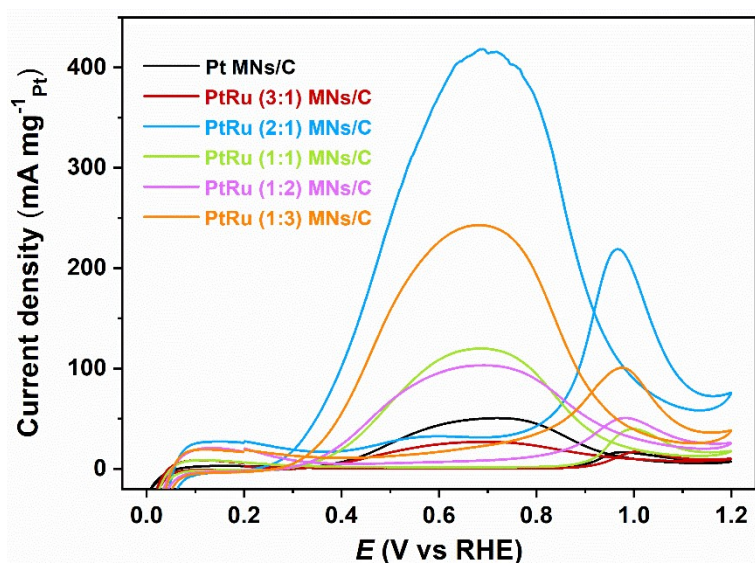

**Fig. S6.** Cyclic voltammetry profiles of the as-prepared PtRu MNs/C and Pt MNs/C catalysts in 0.5 M H<sub>2</sub>SO<sub>4</sub> + 0.5 M HCOOH solution. The sweep rate is 50 mV s<sup>-1</sup>.

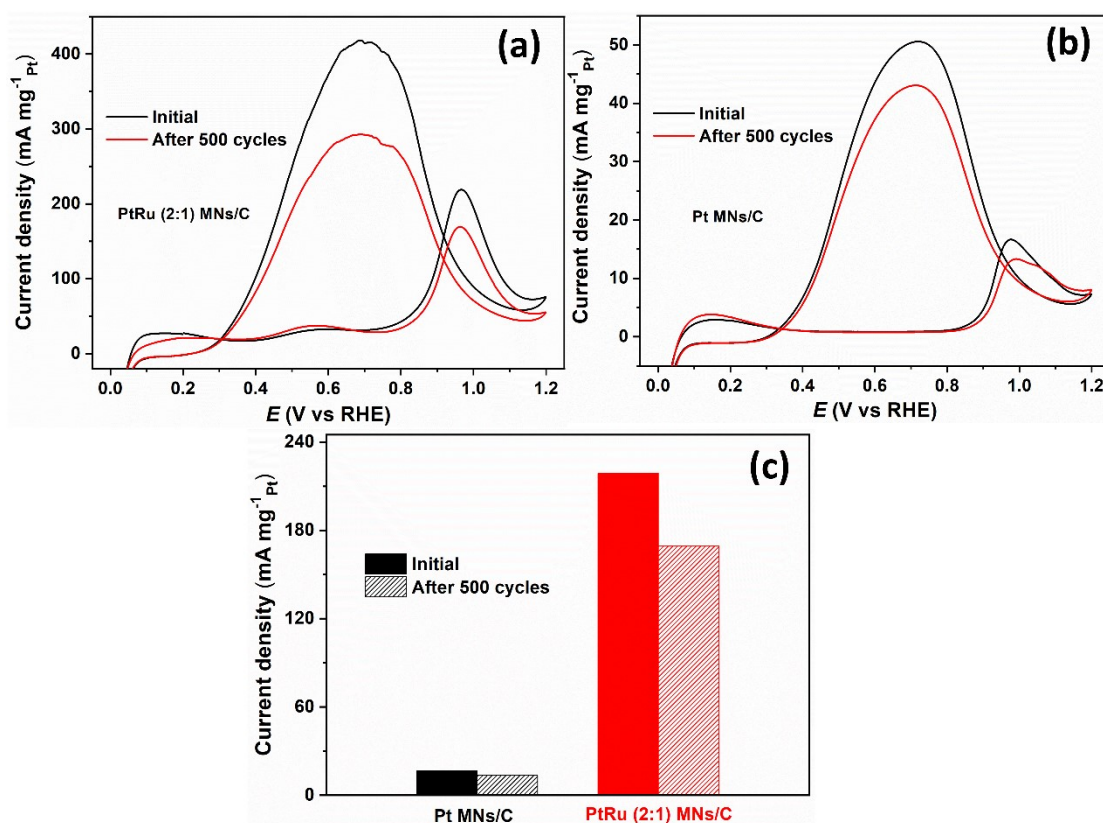

**Fig. S7.** CV curves of (a) PtRu (2:1) MNs/C and (b) Pt MNs/C before and after 500 potential cycles in 0.5 M H<sub>2</sub>SO<sub>4</sub> + 0.5 M HCOOH solution at a scan rate of 50 mV s<sup>-1</sup>. (c) Summary of the mass activity loss for different electrocatalysts.
